# Supplementary material for: Therapeutic Targeting of Retinal Immune Microenvironment With CSF-1 Receptor Antibody Promotes Visual Function Recovery After Ischemic Optic Neuropathy
Source: Front Immunol. 2020 Nov 13;11:585918. doi: 10.3389/fimmu.2020.585918 (PMC7691249; doi:10.3389/fimmu.2020.585918)
Supplement: Supplementary file 1 [file Table_1.docx]

Supplementary material

**Therapeutic targeting of retinal immune microenvironment with CSF-1 Receptor antibody promotes visual function recovery after ischemic optic neuropathy**

Yizhen Tang1,2,3,4, Zebin Xiao5, Pan Li2,6, Dongli Zhuang1,3,4, Kin-Sang Cho2, Kyle Robert2, Xiaoxiao Chen1,3,4, Lian Shu1,3,4, Guangxian Tang7, Jihong Wu1,3,4, Xinghuai Sun1,3,4* and Dong F. Chen2*

1Eye Institute and Department of Ophthalmology, Eye & ENT Hospital, Fudan University, Shanghai, 200031, China

2Schepens Eye Research Institute of Massachusetts Eye and Ear, Department of Ophthalmology, Harvard Medical School, Boston, Massachusetts, USA

3NHC Key Laboratory of Myopia (Fudan University); Key Laboratory of Myopia, Chinese Academy of Medical Sciences, Shanghai, 200031, China

4Shanghai Key Laboratory of Visual Impairment and Restoration, Shanghai, 200031, China

5Department of Radiology, Eye & ENT Hospital, Fudan University, Shanghai, 200031, China

6School of Optometry, the Hong Kong Polytechnic University, Hong Kong, China

7Department of Ophthalmology, Shijiazhuang No. 1 Hospital, Hebei, China

***Correspondence:**
Co-corresponding author, email: [dongfeng_chen@meei.harvard.edu (D.F](mailto:dongfeng_chen@meei.harvard.edu%20(D.F). Chen), xhsun@shmu.edu.cn (X. Sun).

Supplementary Caption:

1. Table S1. Sequences of primers used for qPCR.
2. Figure S1. Retinal ischemia/reperfusion injury induced retinal inflammation.
3. Figure S2. CSF-1RAb alleviated the expressions of inflammatory cytokines in primary mouse microglia.
4. Figure S3. Selective expression of CSF-1R in microglia and the effect of CSF-1RAb in purified microglial cultures.

Table S1. Sequences of primers used for qPCR

| Species | Genes | Forward 5’-3’ | Reverse 5’-3’ |
| --- | --- | --- | --- |
| Rat | Gapdh | TTCAACGGCACAGTCAAGG | CACCAGTGGATGCAGGGAT |
|  | CD16 | AACGGCACTGCTACTTACGG | CGAGATGAGGCTTTTGTTATGG |
|  | CD86 | TAGGGATAACCAGGCTCTAC | CGTGGGTGTCTTTTGCTGTA |
|  | CD206 | CTCTAAGCGCCATCTCCGTT | ATGATCTGCGACTCCGACAC |
|  | TNF-α | CGTCGTAGCAAACCACCAAGC | CCAGTCGCCTCACAGAGCAAT |
|  | IL-1β | AATGACCTGTTCTTTGAGGCTGAC | CGAGATGCTGCTGTGAGATTTGAAG |
|  | TGF-β | CCGCAACAACGCAATCTATG | AGCCCTGTATTCCGTCTCCTT |
| Mouse | Β-actin | GGCTGTATTCCCCTCCATCG | CCAGTTGGTAACAATGCCATGT |
|  | TNF-α | CAAAGGGATGAGAAGTTC | AGATGATCTGAGTGTGAG |
|  | IL-1β | CCTCAATGGACAGAATATC | TTACACAGGACAGGTATAG |
|  | IL-6 | ACCTGTCTATACCACTTCA | GCATCATCGTTGTTCATAC |
|  | IFN-γ | ACACCTGATTACTACCTTCTTC | GACCTCAAACTTGGCAATAC |
| Human | Gapdh | GTCTCCTCTGACTTCAACAGCG | ACCACCCTGTTGCTGTAGCCAA |
|  | TNF-α | CTCTTCTGCCTGCTGCACTTTG | ATGGGCTACAGGCTTGTCACTC |
|  | IL-1β | CCACAGACCTTCCAGGAGAATG | GTGCAGTTCAGTGATCGTACAGG |
|  | IL-6 | TTCTGCCAGTGCCTCTTTGCTG | AGACAGCCACTCACCTCTTCAG |
|  | IFN-γ | GAGTGTGGAGACCATCAAGGAAG | TGCTTTGCGTTGGACATTCAAGTC |


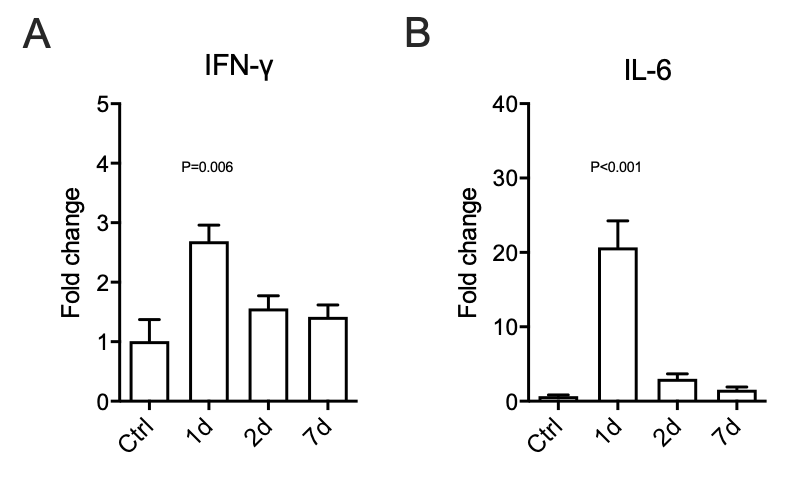


Figure S1. Retinal ischemia/reperfusion injury induced IFN-γ and IL-6 upregulation. Results of qPCR showing fold changes of IFN-γ (A) and IL-6 (B) mRNA levels in retinas of control mice (Ctrl) and mice at 1 – 7 days (d) post RI. One-way ANOVA compared to control (n = 3/group).


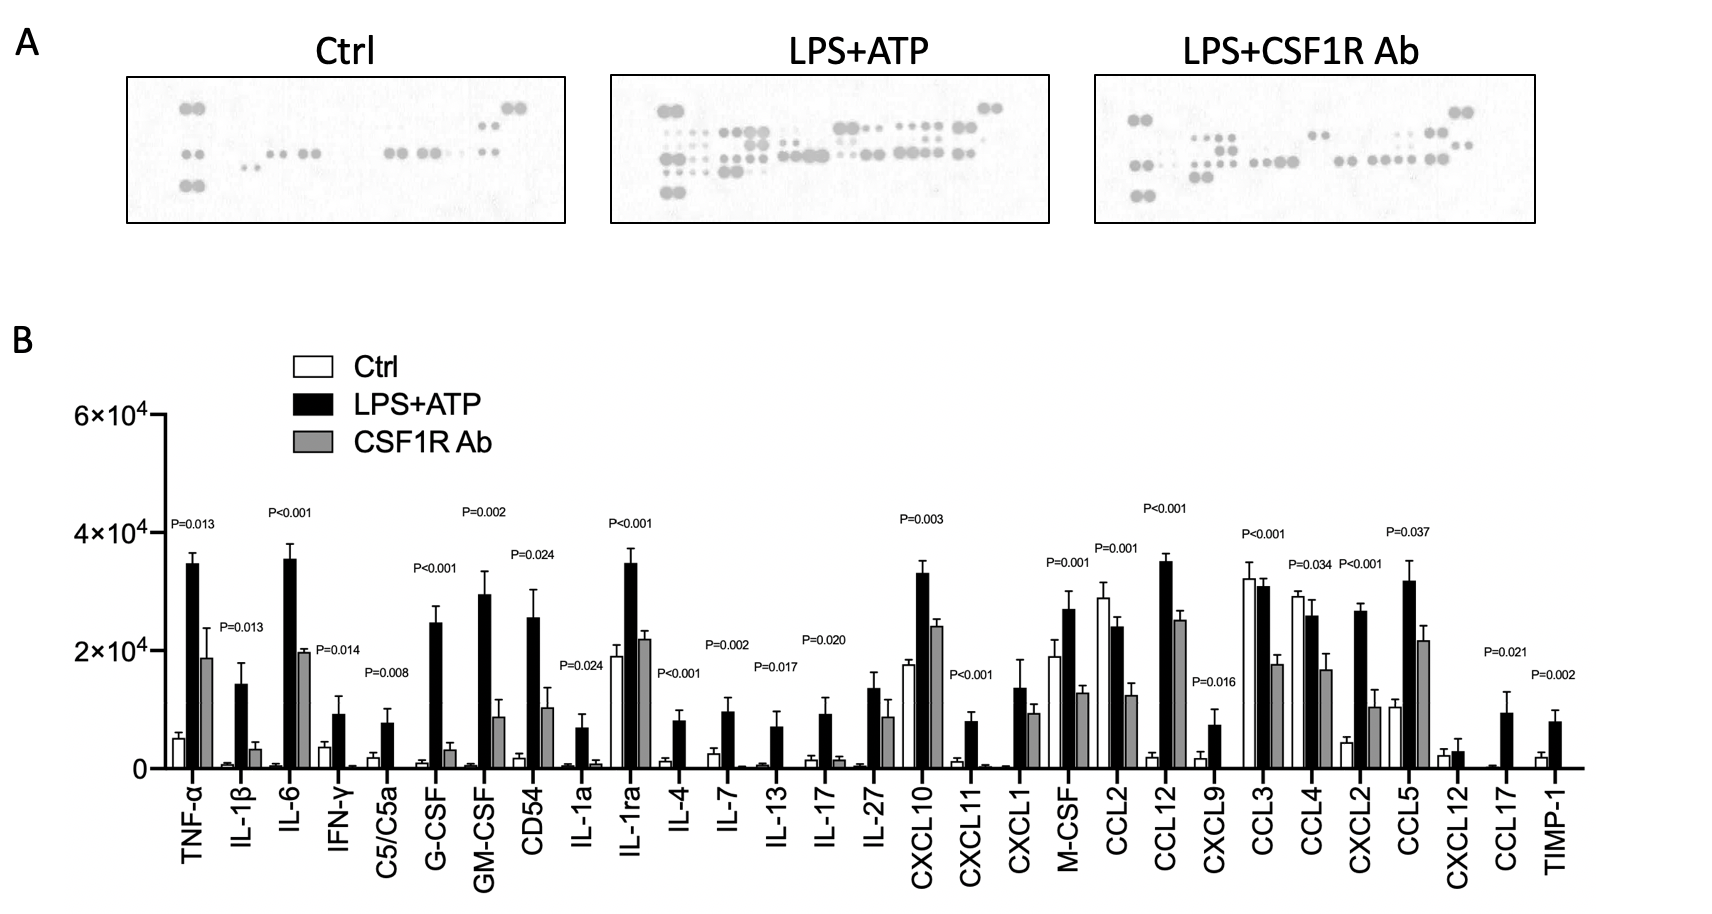


Figure S2. CSF-1RAb administration alleviated the expression of inflammatory cytokines in primary microglial cultures of mice. (A-B) Representative images of cytokine array membrane (A) and quantification (B) of inflammatory cytokines using proteome profiler cytokine array in primary mouse microglial cultures treated with LPS + ATP or LPS + ATP + CSF-1RAb (10 μg/ml). One-way ANOVA comparing between LPS + ATP and CSF-1RAb treatment groups (n = 6/group).


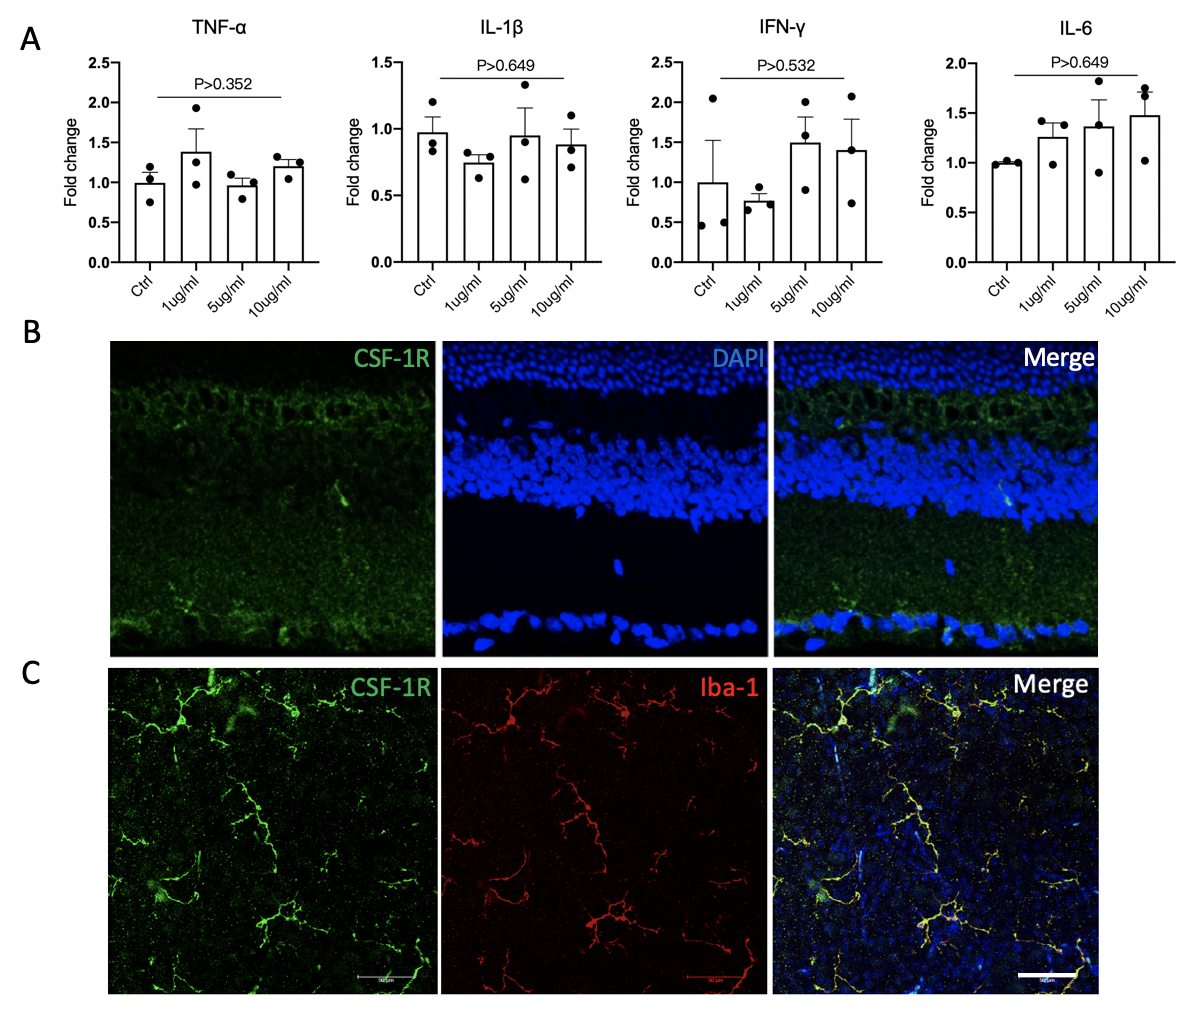


Figure S3. Selective expression of CSF-1R in microglia and the effect of CSF-1RAb in purified microglial cultures. (A) Results of qPCR showing no significant fold changes (of TNF-a, IL-1β, IFN-γ, and IL-6 mRNA levels in primary mouse microglia treated with CSF-1RAb at 1, 5 and 10 μg/ml, respectively (One-way ANOVA, n = 3/group). (B) Epifluorescence photomicrographs of retinal sections of adult mice that were immunolabeled for CSF-1R (green) and counter-stained with a nuclear marker DAPI (blue). (C) Photomicrograph of retinal flat-mount that were double-immunolabeled for CSF-1R (green) and microglial marker Iba-1 (red). Note that CSF-1R signal was strongly colocalized with Iba-1 immunolabeling, but was scarce in other retinal layers or areas. Scale bar: 50 μm.
